CORRECTION

# Correction: Enhancing Mergers and Acquisitions (M&A) Performance: Analyzing the Role of Human Resource Practices in Sri Lanka's Telecommunication Industry Through Lewin's Change Management Model

S. H. N. Pubodhya, Wasantha Rajapakshe

## Notice of Republication

This article was republished on March 13, 2026, to remove an error in the abstract. Please download this article again to view the correct version.

## Reference

1. Pubodhya SHN, Rajapakshe W (2025) Enhancing Mergers and Acquisitions (M&A) performance: Analyzing the role of human resource practices in Sri Lanka's telecommunication industry through Lewin's change management model. PLoS One 20(1): e0317117. <https://doi.org/10.1371/journal.pone.0317117>

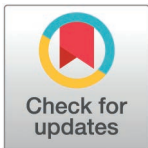

## OPEN ACCESS

**Citation:** Pubodhya SHN, Rajapakshe W (2026) Correction: Enhancing Mergers and Acquisitions (M&A) Performance: Analyzing the Role of Human Resource Practices in Sri Lanka's Telecommunication Industry Through Lewin's Change Management Model. PLoS One 21(4): e0347909. <https://doi.org/10.1371/journal.pone.0347909>

**Published:** April 21, 2026

**Copyright:** © 2026 Pubodhya, Rajapakshe. This is an open access article distributed under the terms of the [Creative Commons Attribution License](https://creativecommons.org/licenses/by/4.0/), which permits unrestricted use, distribution, and reproduction in any medium, provided the original author and source are credited.
